# Supplementary material for: Investigating the Role of Serum and Plasma IL-6, IL-8, IL-10, TNF-alpha, CRP, and S100B Concentrations in Obstructive Sleep Apnea Diagnosis
Source: MDPI journal article supplement (doi:10.3390/ijms241813875), 2023-09-09
Supplement: s1 [file s1]

**Supplementary Material - Table S1.– The concentrations of IL-6, IL-8, IL-10, TNF- $\alpha$ , CRP, and S100B in the serum and plasma**

|               |                                            | <b>OSA<br/>group (n=52)</b>             | <b>Control<br/>group (n=28)</b>          | <b>Effect size<br/><i>Hedges' g</i></b> |
|---------------|--------------------------------------------|-----------------------------------------|------------------------------------------|-----------------------------------------|
| <b>Serum</b>  | <b>IL-6<br/>[pg/ml]</b>                    | 2.29; <1.5-58.6 (1.5-6.36)              | <1.5; <1.5-10.2 (<1.5-<1.5)              | 0.52                                    |
|               | <b>IL-8<br/>[pg/ml]</b>                    | 8.83; 1.87-38.9 (6.81-11.2)             | 6.72; 2.07-20.6 (4.6-11.3)               | 0.61                                    |
|               | <b>IL-10<br/>[pg/ml]</b>                   | <1.43; 0.71-104 (<1.43-10.5)            | <1.43; <1.43-12.3 (<1.43-2.13)           | 0.57                                    |
|               | <b>CRP<br/>[pg/ml]</b>                     | 1.7; <1-118 (<1-3.9)                    | <1; <1-5 (<1-<1)                         | 0.44                                    |
|               | <b>TNF-<math>\alpha</math><br/>[pg/ml]</b> | 3.72; 1.48-8.77 (2.82-4.74)             | 2.82; 0.62-12.3 (2.04-4.16)              | 0.36                                    |
|               | <b>S100B<br/>[pg/ml]</b>                   | 0.045; 0.02-0.203 (0.035-0.058)         | 0.038; 0.017-0.081 (0.03-0.049)          | 0.36                                    |
| <b>Plasma</b> | <b>IL-6<br/>[pg/ml]</b>                    | <1.5; <1.5-24.5 (<1.5-4.17)             | <1.5; <1.5-20.9 (<1.5-1.54)              | 0.16                                    |
|               | <b>IL-8<br/>[pg/ml]</b>                    | 4.8; <1.23-14 (3.51-6.63)               | 2.84; <1.23-9.65 (1.71-4.8)              | 0.82                                    |
|               | <b>IL-10<br/>[pg/ml]</b>                   | <1.43; <1.43-7.38 (<1.43-1.44)          | <1.43; <1.43-1.63 (<1.43-1.43)           | 0.54                                    |
|               | <b>CRP<br/>[pg/ml]</b>                     | 1.6; <1-114 (<1-3.3)                    | <1; <1-4.9 (<1-<1)                       | 0.37                                    |
|               | <b>TNF-<math>\alpha</math><br/>[pg/ml]</b> | 3.21; <2.09-8.9 (2.66-5.16)             | <2.09; <2.09-5.51 (<2.09-3.68)           | 0.46                                    |
|               | <b>S100B<br/>[pg/ml]</b>                   | <0.005; <0.005-0.049 (<0.005<br><0.005) | <0.005; <0.005-0.006 (<0.005-<br><0.005) | 0.20                                    |

Values are presented as median; minimum-maximum (Interquartile range). **Values represented with the "<" sign indicate the detection threshold of studied biomarkers.** Abbreviations: IL-6, Interleukin-6; IL-8, Interleukin-8; IL-10, Interleukin-10; CRP, C-reactive protein; TNF, Tumor Necrosis Factor; S100B, S100 calcium-binding protein B; OSA, Obstructive Sleep Apnea.
